# Supplementary material
Source: PubMed Central journal article supplement (PMC5427274)
Supplement: 10.1074_M117.776179_jbc.M117.776179-1.pdf [file 10.1074_M117.776179_jbc.M117.776179-1.pdf]

## **Molecular mechanisms of isocitrate dehydrogenase 1 (IDH1) mutations identified in tumors: the role of size and hydrophobicity at residue 132 on catalytic efficiency**

Diego Avellaneda Matteo<sup>1,‡</sup>, Adam J. Grunseith<sup>1,‡</sup>, Eric R. Gonzalez<sup>‡</sup>, Stacy L. Anselmo<sup>‡</sup>, Madison A. Kennedy<sup>‡</sup>, Precious Moman<sup>‡</sup>, David A. Scott<sup>§</sup>, An Hoang<sup>‡</sup>, and Christal D. Sohl<sup>‡,2</sup>

From the <sup>‡</sup>Department of Chemistry and Biochemistry, San Diego State University, San Diego, CA 92182, and the <sup>§</sup>Sanford Burnham Prebys Medical Discovery Institute, La Jolla, CA 92037

<sup>1</sup>Both authors contributed equally to this work.

<sup>2</sup>To whom correspondence should be addressed: Prof. Christal D. Sohl, Department of Chemistry and Biochemistry, San Diego State University, CSL 328, MC1030, 5500 Campanile Dr., San Diego, California 92182, Telephone: (619) 594-2053; Fax: (619) 594-4634; Email: [csohl@mail.sdsu.edu](mailto:csohl@mail.sdsu.edu)

### **Supplemental methods content:**

Supplemental Figure S1

Supplemental Figure S2

Supplemental Figure S3

Supplemental Figure S4

Supplemental Figure S5

Supplemental Figure S6

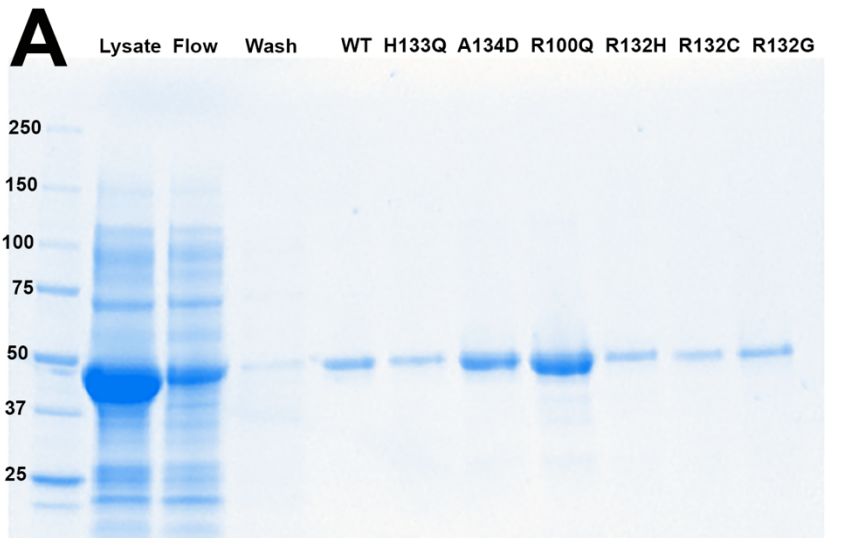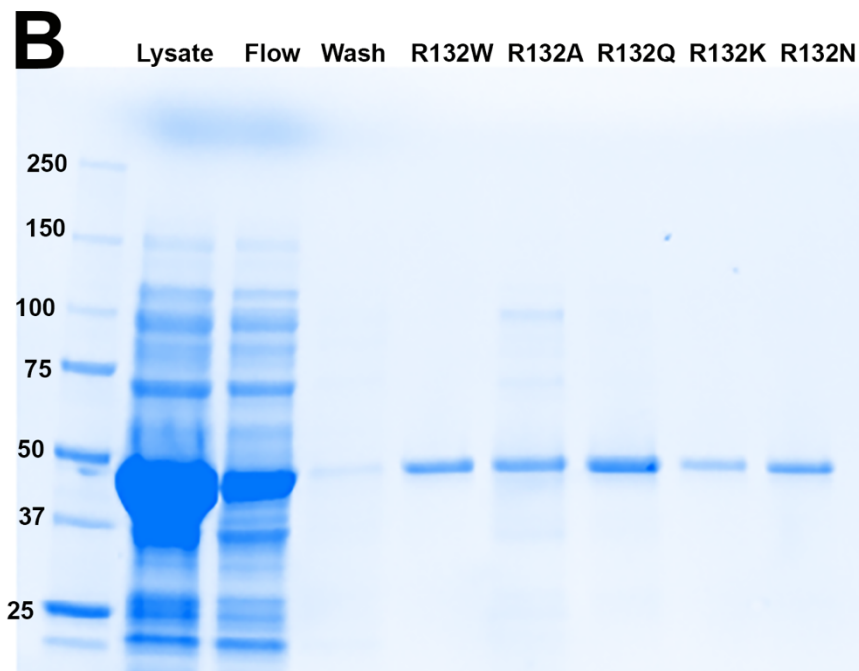

**Supplemental Figure S1.** Purification of WT and mutant IDH1. (A) SDS-PAGE analysis of the IDH1 tumor mutants. (B) SDS-PAGE analysis of the IDH1 experimental mutants. Lysate indicates the whole cell lysate, Flow indicates the flow-through after loading the lysate onto a nickel-NTA column, and Wash indicates the flow-through after a buffer wash prior to elution. 4-12% BioRad Stain-free gels were used.

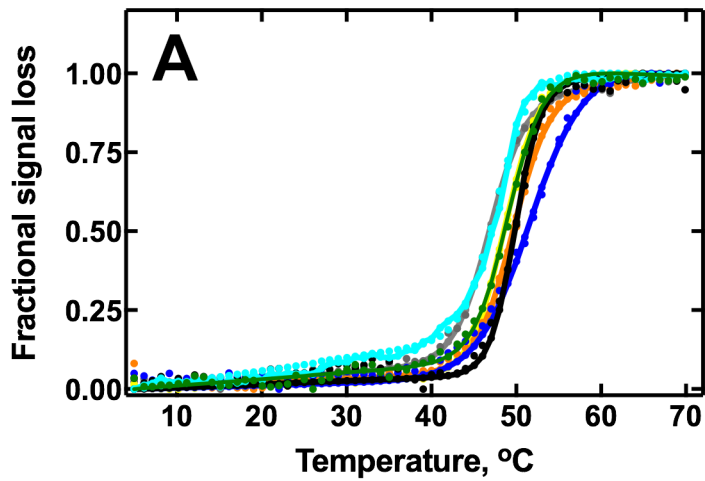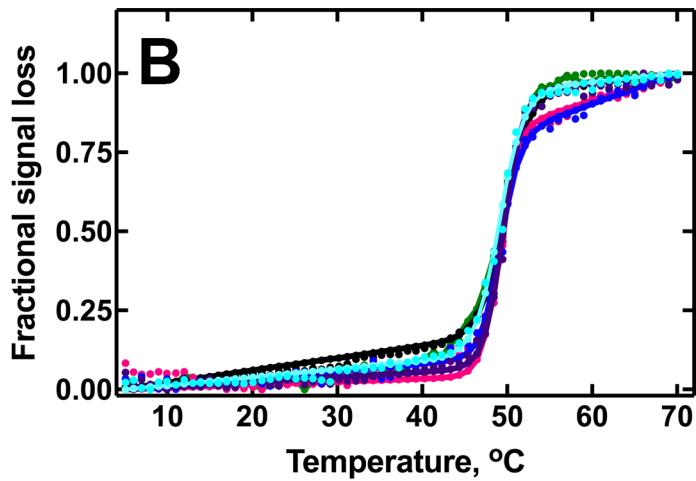

**Supplemental Figure S2.** Thermal melt curves employing circular dichroism were used to determine the melting temperature ( $T_m$ ) of IDH1 mutants. (A) WT IDH1 is shown in green ( $T_m = 49.1 \pm 0.1$  °C); A134D in cyan ( $T_m = 48.7 \pm 0.1$  °C); H133Q in black ( $T_m = 49.9 \pm 0.1$  °C); R100Q in dark blue ( $T_m = 51.9 \pm 0.1$  °C); R132H in orange ( $T_m = 49.7 \pm 0.1$  °C); R132C in yellow ( $T_m = 46.8 \pm 0.1$  °C); and R132G in grey ( $T_m = 46.9 \pm 0.1$  °C). (B) WT IDH1 is shown in green ( $T_m = 49.1 \pm 0.1$  °C); R132W is in purple ( $T_m = 49.5 \pm 0.1$  °C); R132A in dark blue ( $T_m = 49.2 \pm 0.1$  °C); R132N in cyan ( $T_m = 49.1 \pm 0.1$  °C); R132Q in magenta ( $T_m = 49.0 \pm 0.1$  °C); and R132K in black ( $T_m = 49.8 \pm 0.1$  °C).

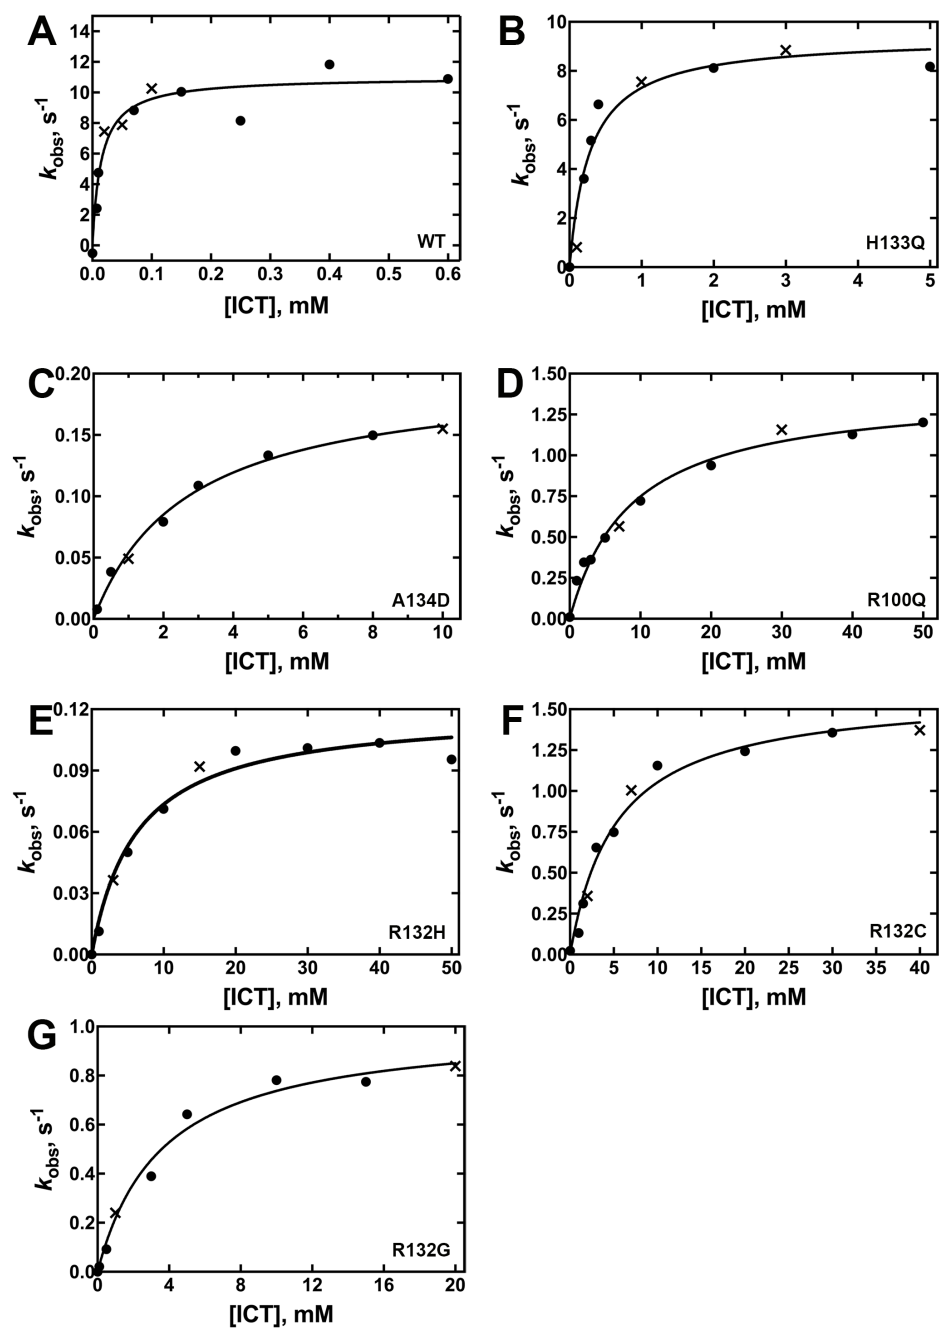

**Supplemental Figure S3.** Concentration dependence of ICT concentration on the observed rate of NADPH production in the normal reaction, conversion of ICT to  $\alpha$ KG (21 °C). The determined  $k_{\text{obs}}$  values were obtained from two different enzyme preparations to ensure reproducibility. The  $k_{\text{obs}}$  values resulting from each of the two enzyme preparations are distinguished by using either a circle or an  $\times$  in the plots. The observed rate constants ( $k_{\text{obs}}$ ) were calculated from the linear range of the slopes of plots of concentration versus time using GraphPad Prism software (GraphPad, San Diego, CA.) These  $k_{\text{obs}}$  values were then fit to a hyperbolic equation to generate  $k_{\text{cat}}$  and  $K_{\text{m}}$  values, and the standard error results from the deviance from these hyperbolic fits is indicated.  $K_{\text{m}}$  values and efficiency are in terms of [ICT]. (A) WT IDH1. (B) H133Q IDH1. (C) A134D IDH1. (D) R100Q IDH1. (E) R132H IDH1. (F) R132C IDH1. (G) R132G IDH1.

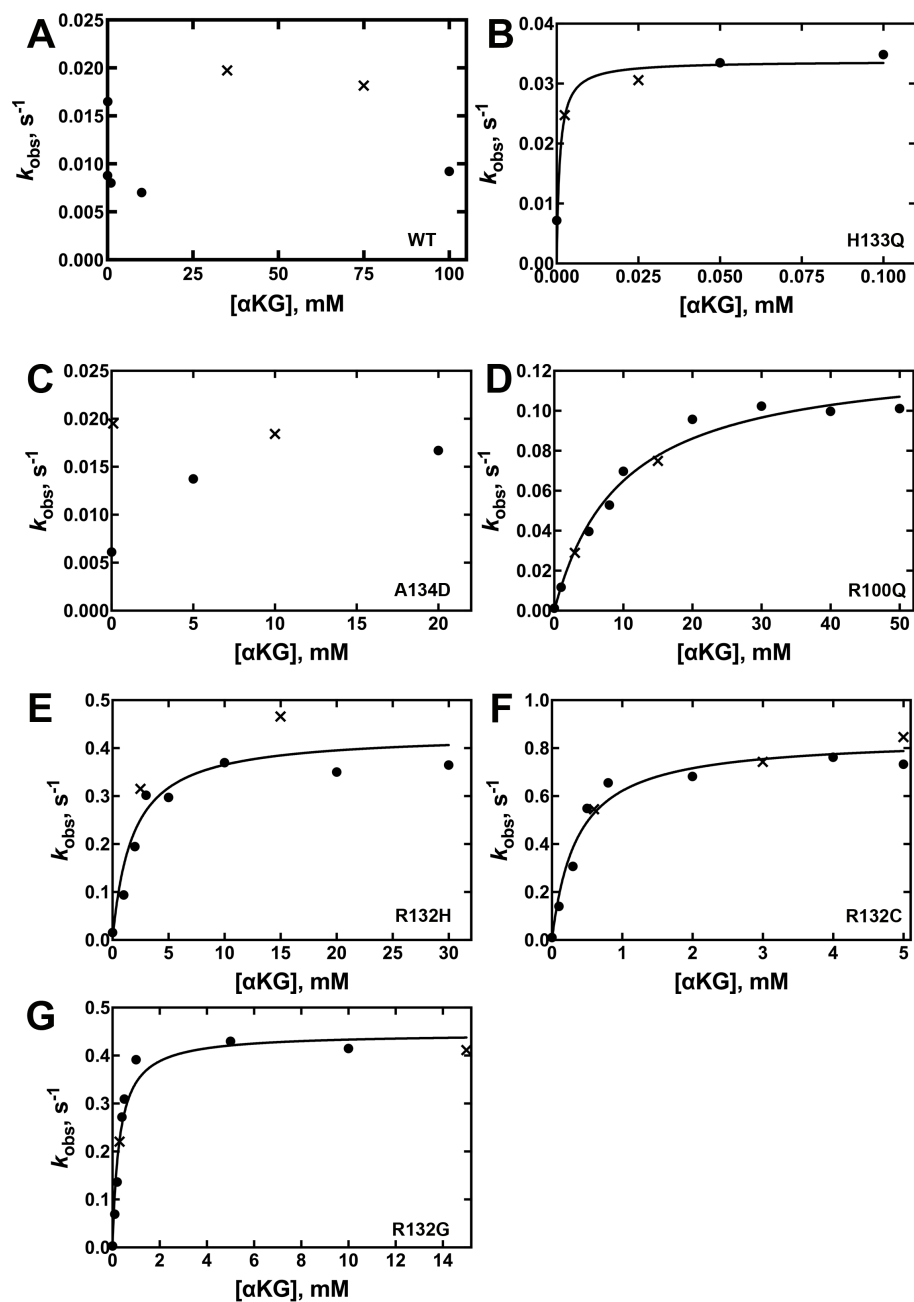

**Supplemental Figure S4.** Concentration dependence of  $\alpha\text{KG}$  concentration on the observed rate of NADPH depletion in the neomorphic reaction, conversion of  $\alpha\text{KG}$  to D2HG (21 °C). The determined  $k_{\text{obs}}$  values were obtained from two different enzyme preparations to ensure reproducibility. The  $k_{\text{obs}}$  values resulting from each of the two enzyme preparations are distinguished by using either a circle or an  $\times$  in the plots. The observed rate constants ( $k_{\text{obs}}$ ) were calculated from the linear range of the slopes of plots of concentration versus time using GraphPad Prism software (GraphPad, San Diego, CA). These  $k_{\text{obs}}$  values were then fit to a hyperbolic equation to generate  $k_{\text{cat}}$  and  $K_{\text{m}}$  values, and the standard error results from the deviance from these hyperbolic fits is indicated.  $K_{\text{m}}$  values and efficiency are in terms of  $[\alpha\text{KG}]$ . (A) WT IDH1. (B) H133Q IDH1. (C) A134D IDH1. (D) R100Q IDH1. (E) R132H IDH1. (F) R132C IDH1. (G) R132G IDH1.

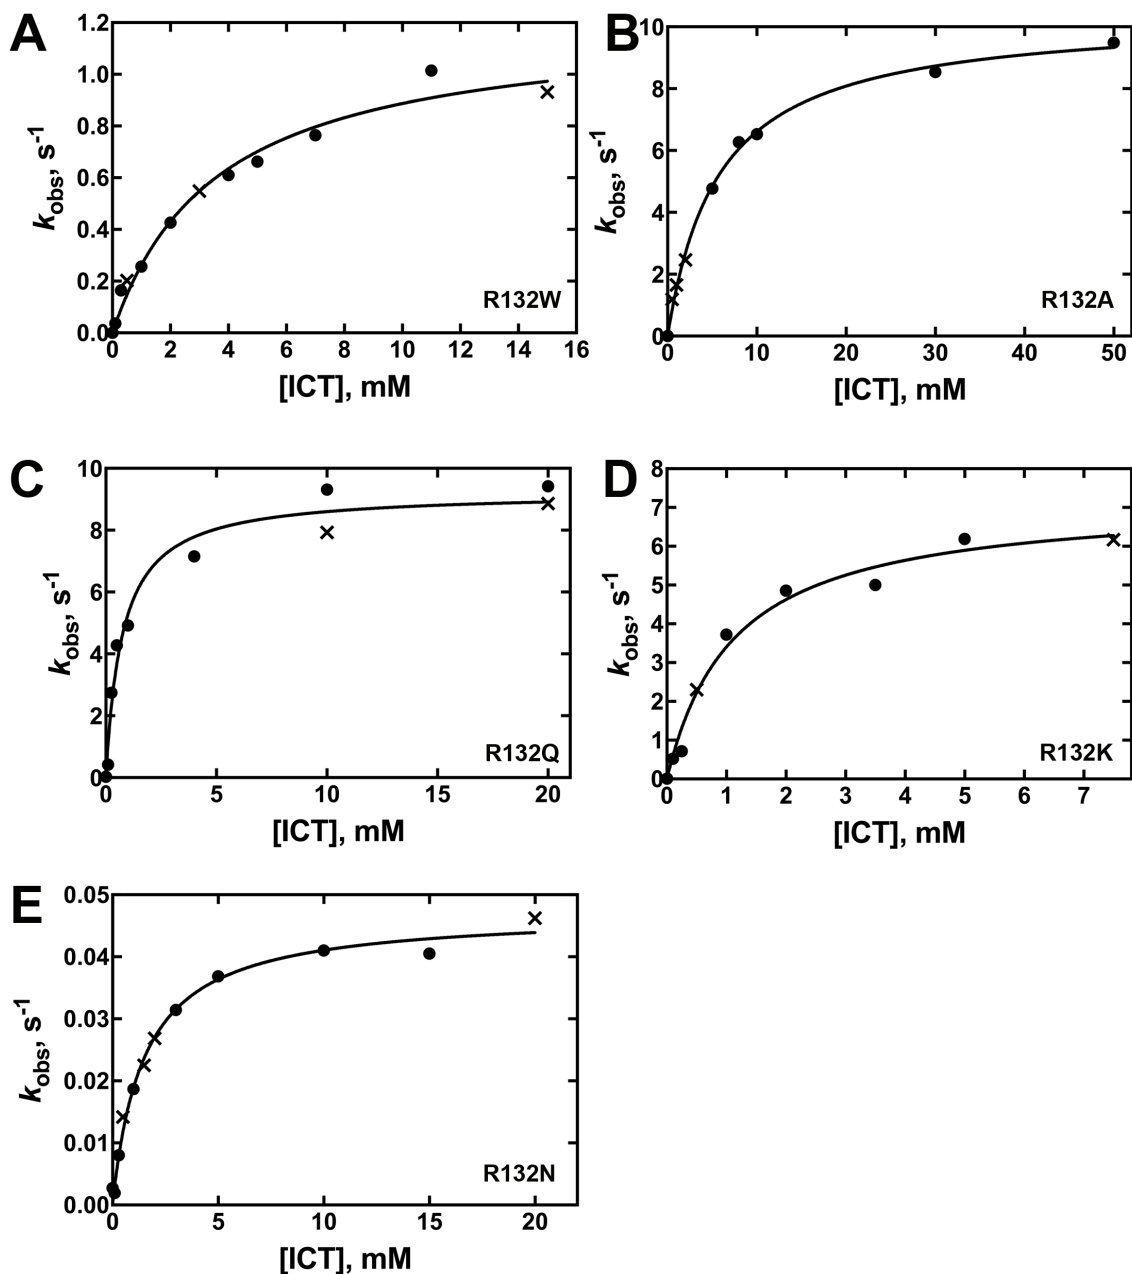

**Supplemental Figure S5.** Concentration dependence of ICT concentration on the observed rate of NADPH production in the normal reaction, conversion of ICT to  $\alpha$ KG (37 °C). The determined  $k_{obs}$  values were obtained from two different enzyme preparations to ensure reproducibility. The  $k_{obs}$  values resulting from each of the two enzyme preparations are distinguished by using either a circle or an  $\times$  in the plots. The observed rate constants ( $k_{obs}$ ) were calculated from the linear range of the slopes of plots of concentration versus time using GraphPad Prism software (GraphPad, San Diego, CA). These  $k_{obs}$  values were then fit to a hyperbolic equation to generate  $k_{cat}$  and  $K_m$  values, and the standard error results from the deviance from these hyperbolic fits is indicated.  $K_m$  values and efficiency are in terms of [ICT]. (A) R132W IDH1. (B) R132A IDH1. (C) R132Q IDH1. (D) R132K IDH1. (E) R132N IDH1.

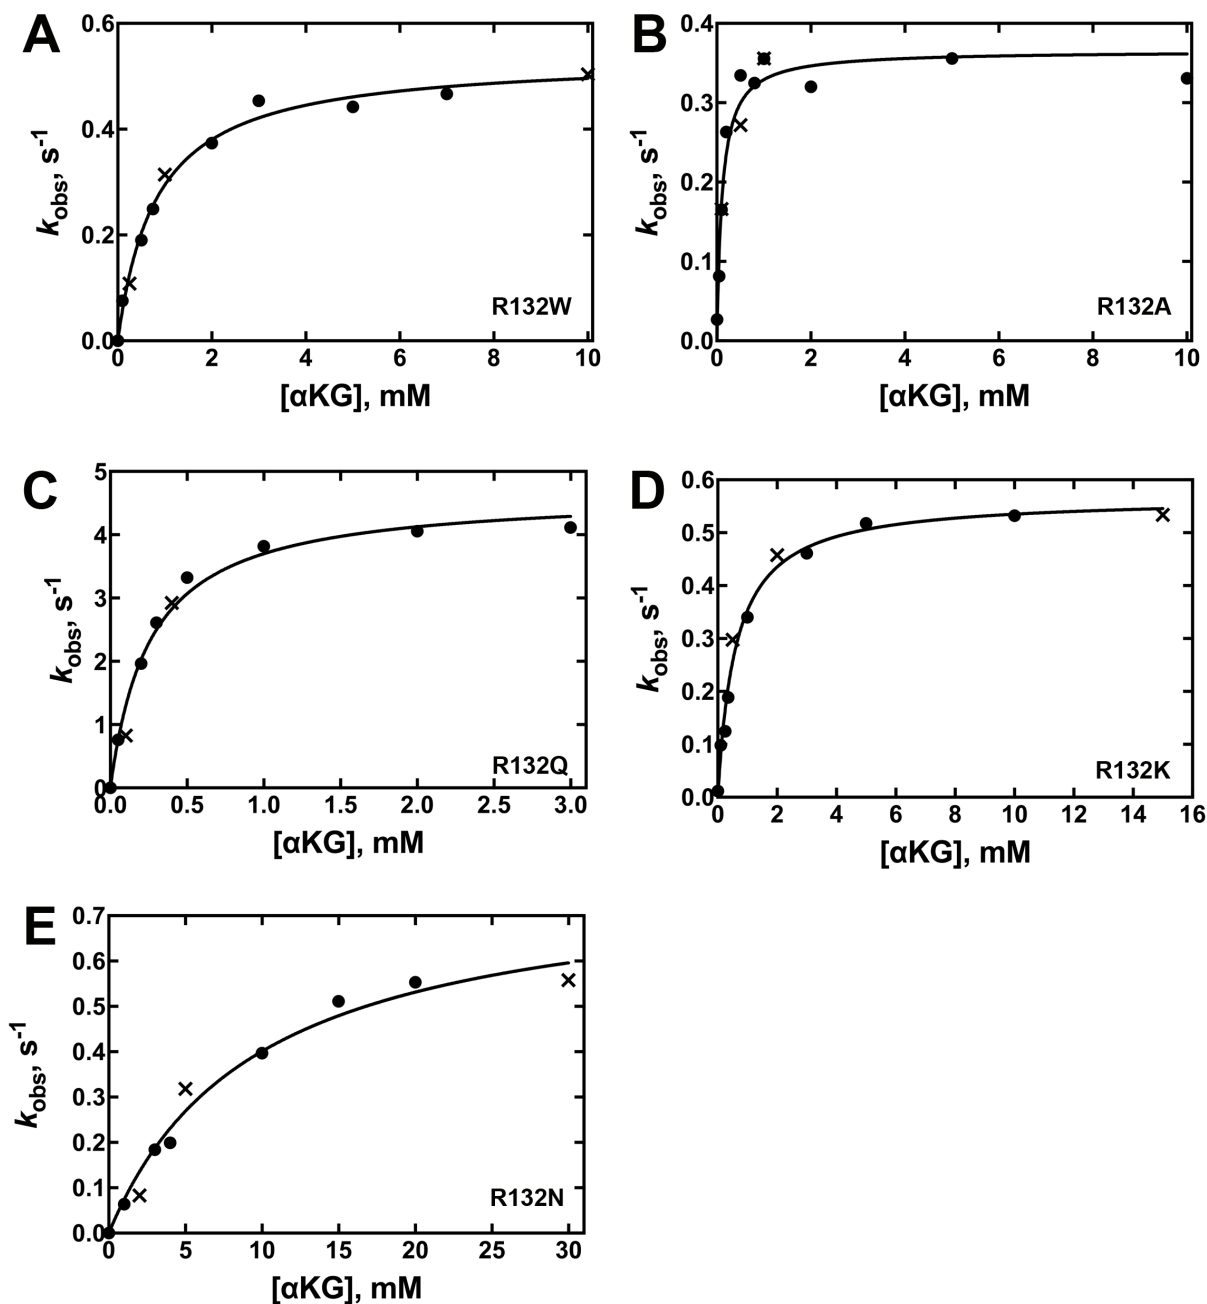

**Supplemental Figure S6.** Concentration dependence of  $\alpha$ KG concentration on the observed rate of NADPH depletion in the neomorphic reaction, conversion of  $\alpha$ KG to D2HG (37 °C). The determined  $k_{obs}$  values were obtained from two different enzyme preparations to ensure reproducibility. The  $k_{obs}$  values resulting from each of the two enzyme preparations are distinguished by using either a circle or an  $\times$  in the plots. The observed rate constants ( $k_{obs}$ ) were calculated from the linear range of the slopes of plots of concentration versus time using GraphPad Prism software (GraphPad, San Diego, CA). These  $k_{obs}$  values were then fit to a hyperbolic equation to generate  $k_{cat}$  and  $K_m$  values, and the standard error results from the deviance from these hyperbolic fits is indicated.  $K_m$  values and efficiency are in terms of  $[\alpha KG]$ . (A) R132W IDH1. (B) R132A IDH1. (C) R132Q IDH1. (D) R132K IDH1. (E) R132N IDH1.
